# Supplementary material
Source: PubMed Central journal article supplement (PMC9923580)
Supplement: PEDS_20160430SupplementaryData.pdf [file PEDS_20160430SupplementaryData.pdf]

## Supplemental Information

**SUPPLEMENTAL TABLE 2** Meta-regression Testing Moderators of ADHD and Comorbid ODD in Girls

| Moderator                                      | $\tau^2$ | CI               | <i>P</i> |
|------------------------------------------------|----------|------------------|----------|
| Year published                                 | 0.02     | (-0.10 to 0.14)  | .75      |
| Age                                            |          |                  |          |
| Child                                          | 0.36     | (-1.13 to 1.86)  | .63      |
| Adolescent                                     | -0.77    | (-2.08 to 0.53)  | .25      |
| % White                                        | <0.01    | (-0.04 to 0.04)  | .99      |
| Sample source                                  |          |                  |          |
| Clinic versus community                        | -0.51    | (-1.68 to 0.66)  | .40      |
| % Medicated                                    | -0.02    | (-0.04 to 0.01)  | .29      |
| ADHD subtypes                                  | -0.32    | (-1.61 to 0.97)  | .63      |
| ADHD informant                                 |          |                  |          |
| Parent + teacher versus parent only            | -0.62    | (-1.99 to 0.76)  | .38      |
| Parent + child versus parent only              | -1.33    | (-2.47 to -0.19) | .02      |
| ADHD assessment method                         |          |                  |          |
| Rating scale only versus interview only        | 0.24     | (-1.22 to 1.69)  | .75      |
| Rating scale + interview versus interview only | -0.40    | (-2.16 to 1.37)  | .66      |

**SUPPLEMENTAL TABLE 3** Meta-regression Testing Moderators of ADHD and Comorbid Anxiety in Girls

| Moderator                                      | $\tau^2$ | CI               | <i>P</i> |
|------------------------------------------------|----------|------------------|----------|
| Year published                                 | <0.01    | (-0.13 to 0.14)  | .96      |
| Age                                            |          |                  |          |
| Child                                          | -0.67    | (-1.55 to 0.21)  | .13      |
| Adolescent                                     | -0.80    | (-1.46 to -0.13) | .02      |
| % White                                        | -0.01    | (-0.03 to 0.01)  | .59      |
| Sample source                                  |          |                  |          |
| Clinic versus community                        | 0.68     | (0.07 to 1.29)   | .03      |
| % Medicated                                    | -0.02    | (-0.06 to 0.03)  | .48      |
| ADHD subtypes                                  | -0.38    | (-1.76 to 0.10)  | .59      |
| ADHD informant                                 |          |                  |          |
| Parent + teacher versus parent only            | 0.29     | (-1.68 to 2.25)  | .77      |
| Parent + child versus parent only              | -0.50    | (-2.18 to 1.17)  | .56      |
| ADHD assessment method                         |          |                  |          |
| Rating scale only versus interview only        | -0.07    | (-0.84 to 0.71)  | .87      |
| Rating scale + interview versus interview only | 1.91     | (0.52 to 3.30)   | <.01     |
| No. anxiety disorders assessed                 | -0.06    | (-0.29 to 0.18)  | .65      |
